# Supplementary material
Source: publisher figshare collection journal article supplement (https://karger.figshare.com/ndownloader/files/25659338)
Supplement: Supplementary file 1 [file 25659338]

**Supplementary Table 2.** Inter-observer agreement between the four pathologists

|  |  | **Pathologist 2** |  | **Kappa (95% CI)** |
| --- | --- | --- | --- | --- |
|  |  | PD NSCC/SCC | WD |  |
| **Pathologist 1** | PD NSCC/SCC | 153 | 10 | 0.7 (0.55-0.85) |
|  | WD | 4 | 20 |  |
|  |  |  |  |  |
|  |  | **Pathologist 3** |  |  |
|  |  | PD NSCC/SCC | WD |  |
| **Pathologist 1** | PD NSCC/SCC | 166 | 4 | 0.79 (0.66-0.92) |
|  | WD | 5 | 20 |  |
|  |  |  |  |  |
|  |  | **Pathologist 4** |  |  |
|  |  | PD NSCC/SCC | WD |  |
| **Pathologist 1** | PD NSCC/SCC | 147 | 20 | 0.54 (0.38-0.7) |
|  | WD | 4 | 19 |  |
|  |  |  |  |  |
|  |  | **Pathologist 3** |  |  |
|  |  | PD NSCC/SCC | WD |  |
| **Pathologist 2** | PD NSCC/SCC | 157 | 2 | 0.73 (0.59-0.88) |
|  | WD | 10 | 20 |  |
|  |  |  |  |  |
|  |  | **Pathologist 4** |  |  |
|  |  | PD NSCC/SCC | WD |  |
| **Pathologist 2** | PD NSCC/SCC | 143 | 13 | 0.64 (0.49-0.79) |
|  | WD | 6 | 22 |  |
|  |  |  |  |  |
|  |  | **Pathologist 4** |  |  |
|  |  | PD NSCC/SCC | WD |  |
| **Pathologist 3** | PD NSCC/SCC | 148 | 23 | 0.47 (0.31-0.63) |
|  | WD | 5 | 17 |  |
